# Supplementary material for: Identification of a novel trigger complex that facilitates ribosome-associated quality control in mammalian cells
Source: PubMed Central journal article supplement (PMC7042231; doi:10.1038/s41598-020-60241-w), 2020-02-25

Supplementary material

**Identification of a novel trigger complex that facilitates ribosome-associated quality control in mammalian cells**

**Authors:** Satoshi Hashimoto<sup>1,2</sup>, Takato Sugiyama<sup>1,2</sup>, Reina Yamazaki<sup>1</sup>, Risa Nobuta<sup>1</sup> and Toshifumi Inada<sup>1\*</sup>

**Affiliations:**

<sup>1</sup>From the Graduate School of Pharmaceutical Sciences, Tohoku University, Sendai 980-8578, Japan.

<sup>2</sup>These authors contributed equally to this study.

**This PDF file includes:**

Figure S1-S9

Fig. S1

**A** *V5-GFP-K(AAA)24-FLAG-HIS3*

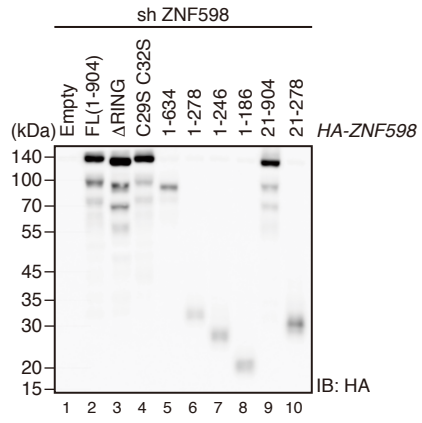

**B** relative mRNA level against control (%)

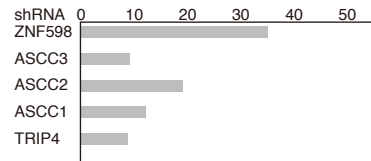

**C** *V5-GFP-FLAG-HIS3*

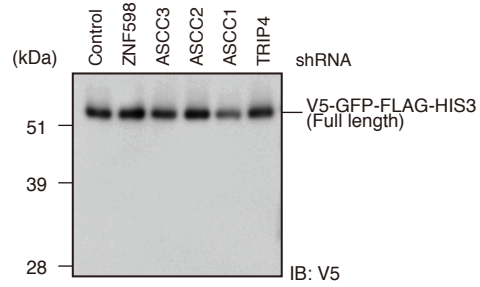

Fig. S2

2C

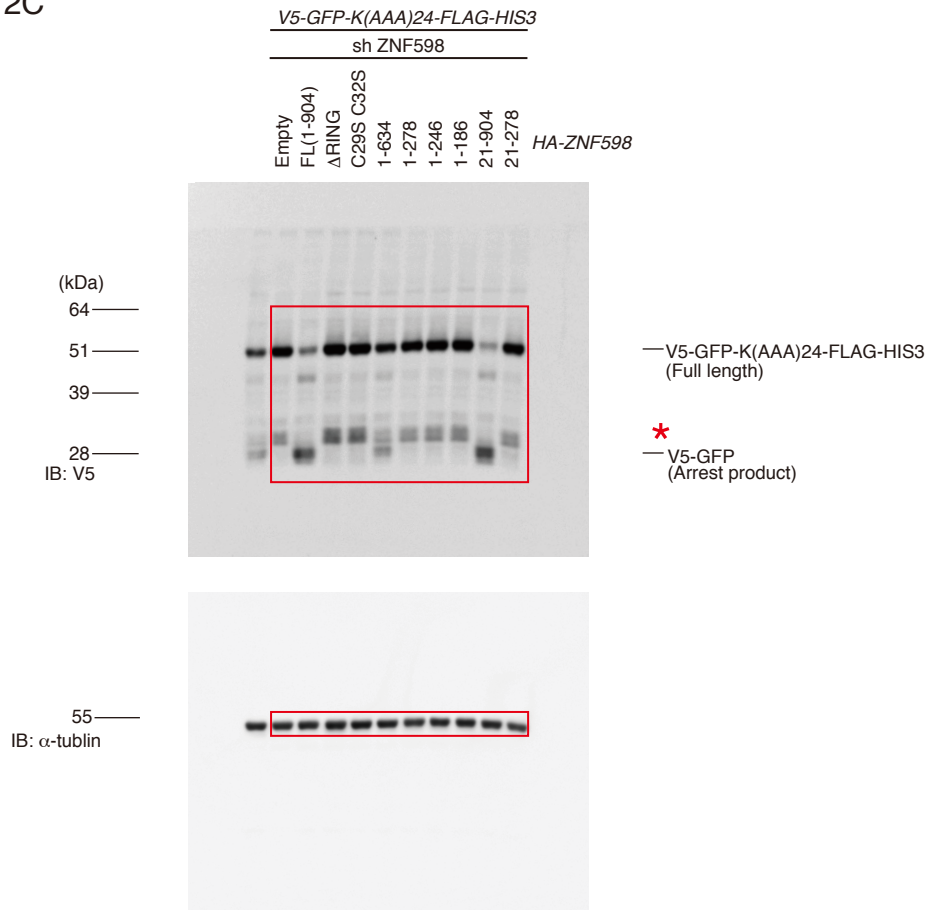

Fig. S3

3B-E

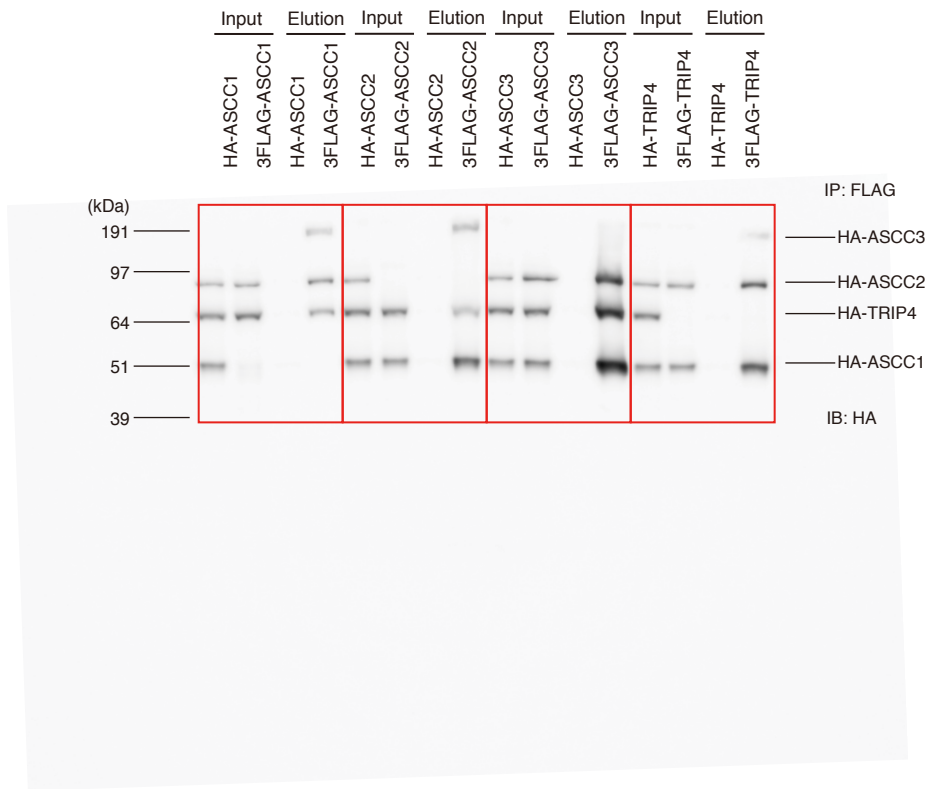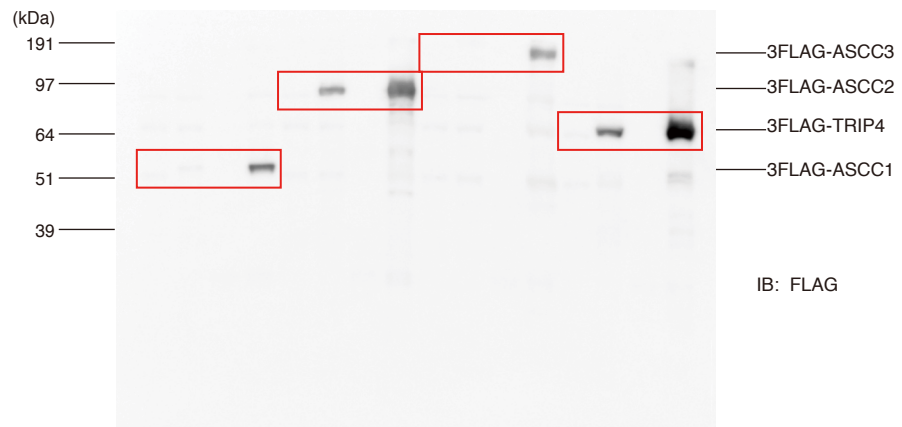

Fig. S4

4A

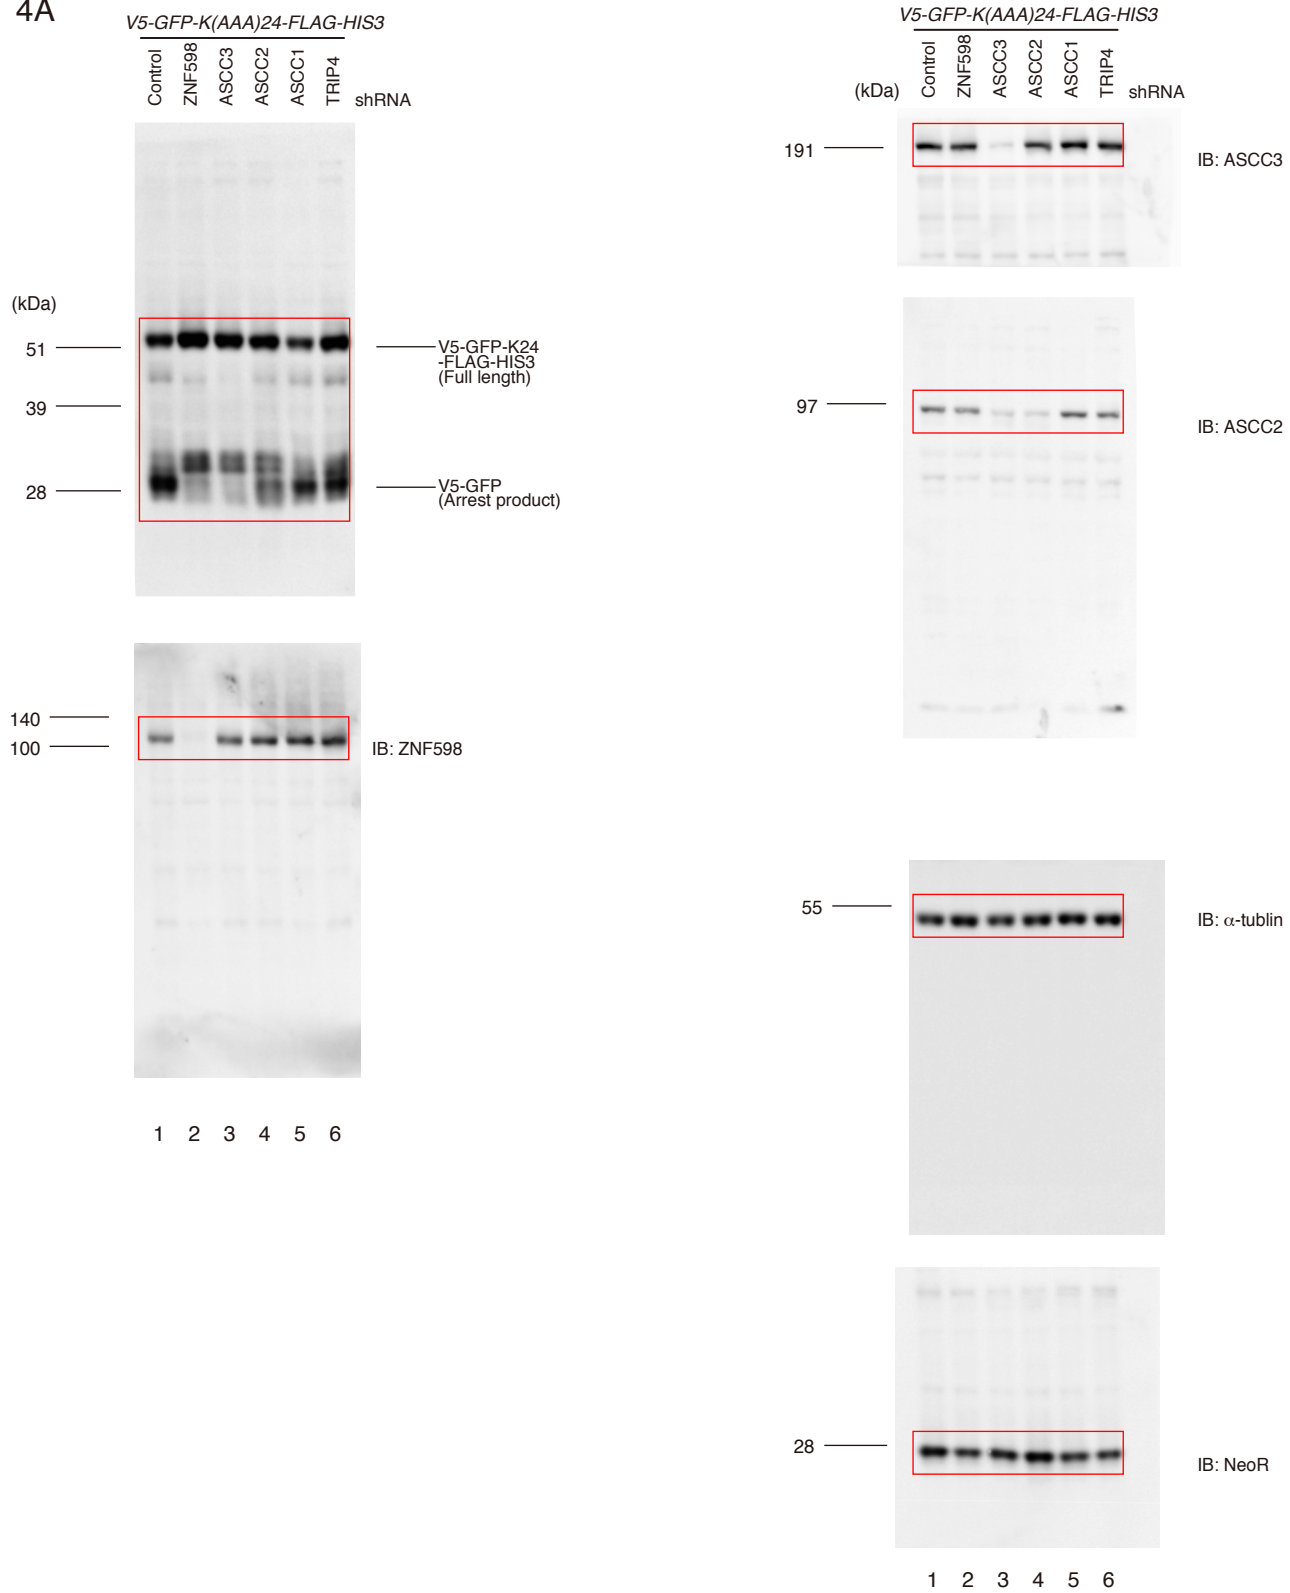

Fig. S5

4B-D

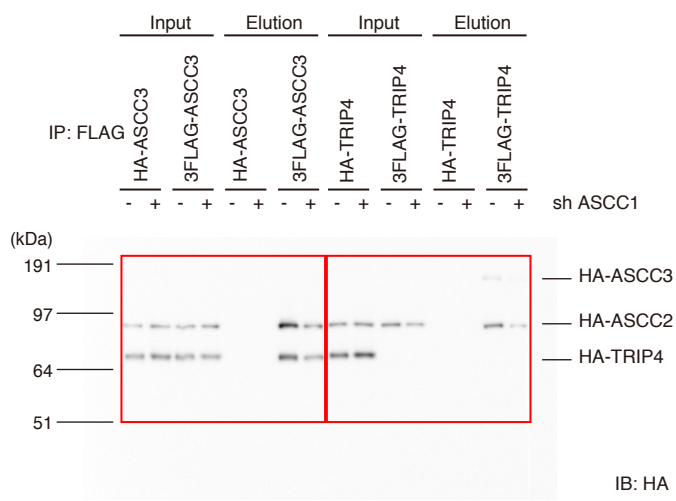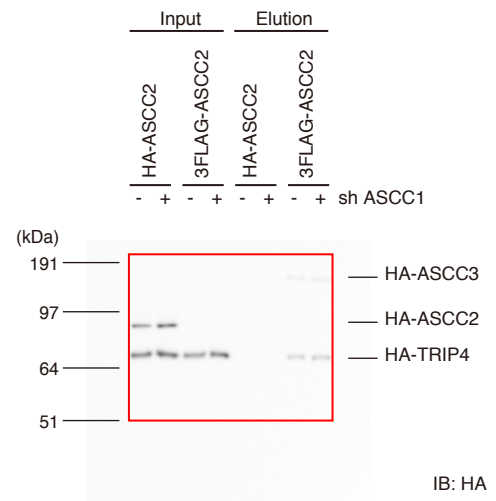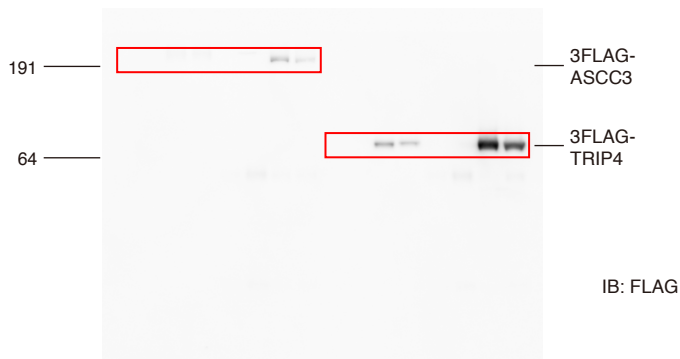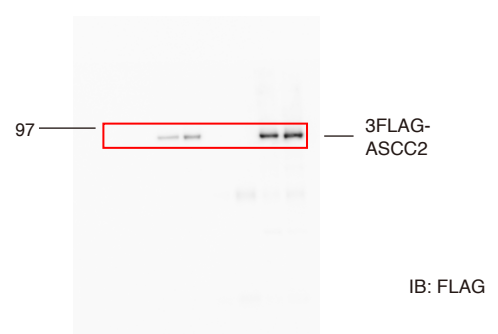

Fig. S6

5B *V5-GFP-K24-FLAG-HIS3*

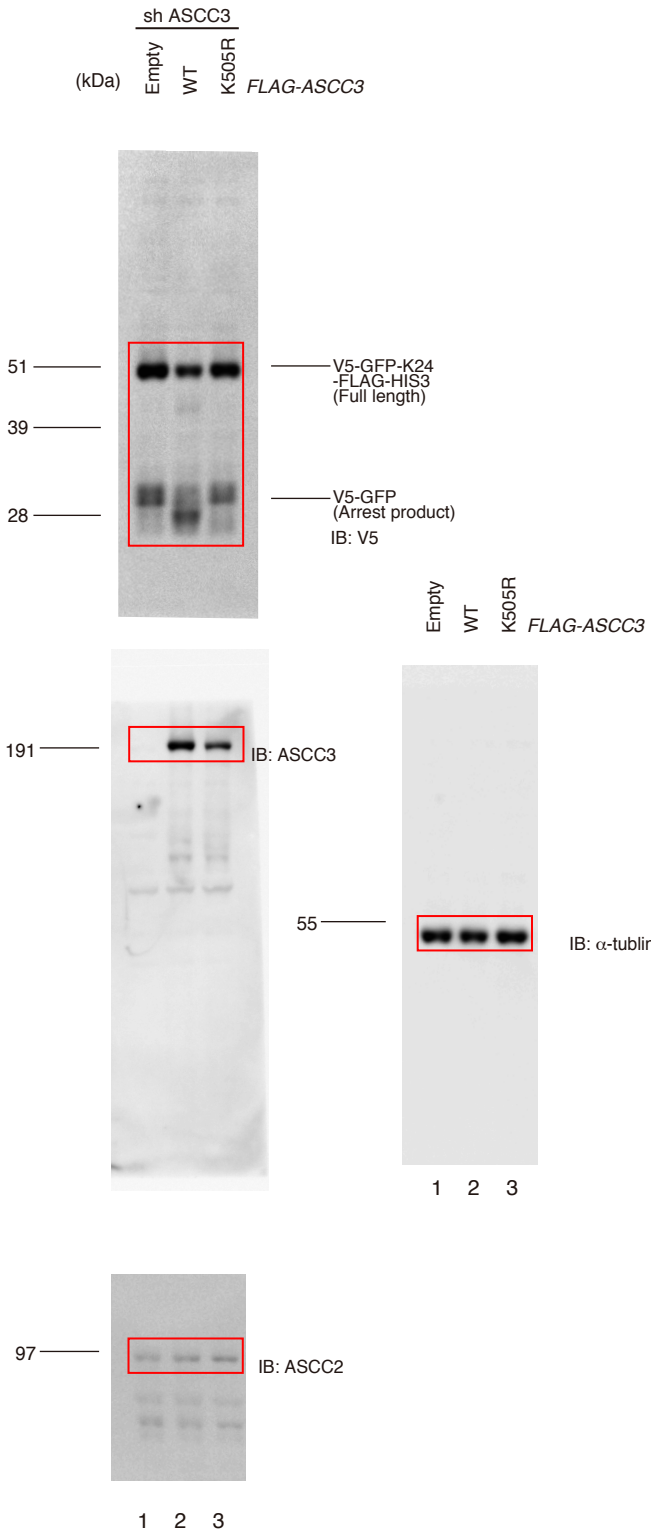

5C

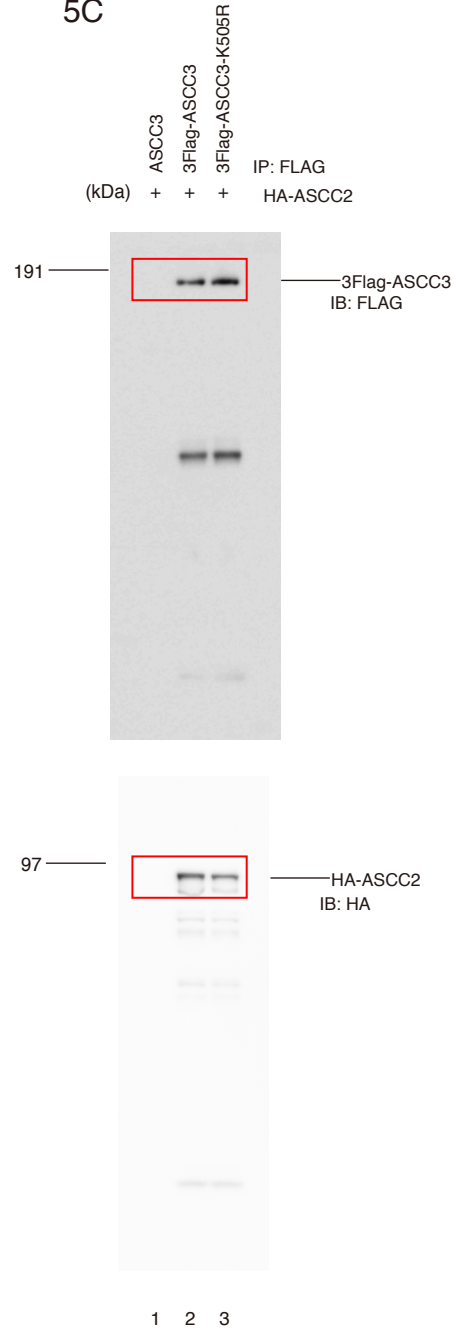

Fig. S7

5D

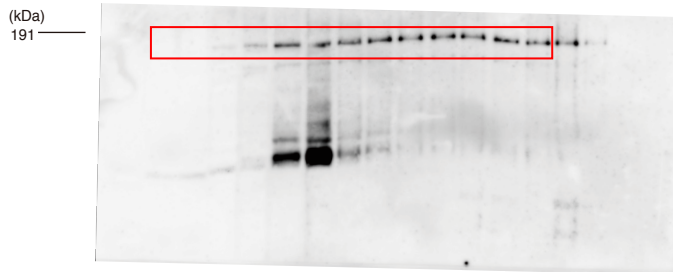

FLAG-ASCC3-WT

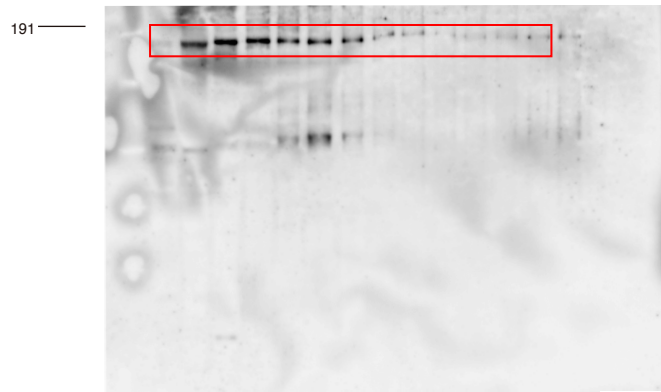

FLAG-ASCC3-K505R

1 2 3 4 5 6 7 8 9 10 11 12 13

IB: FLAG



Fig. S8

6B

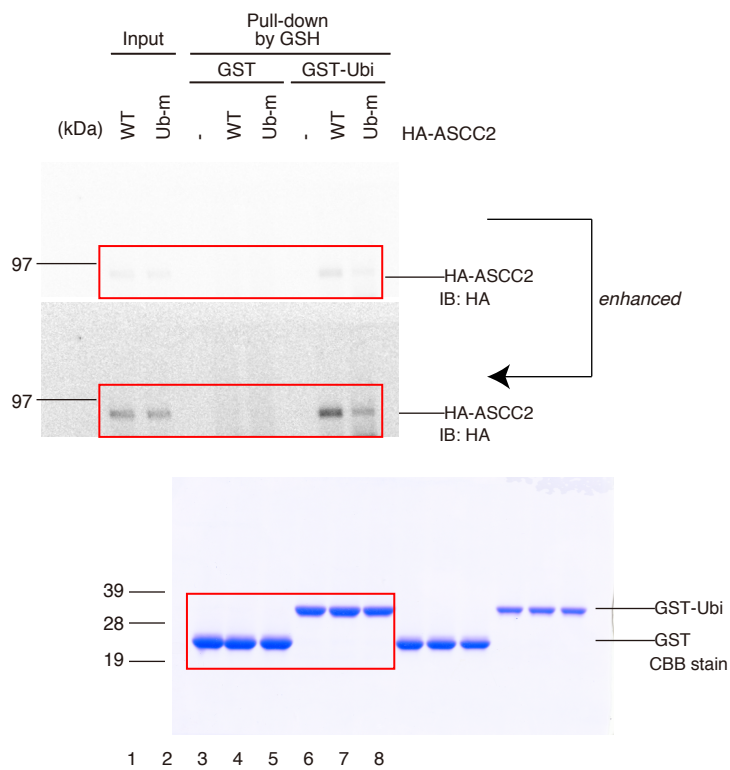

6D

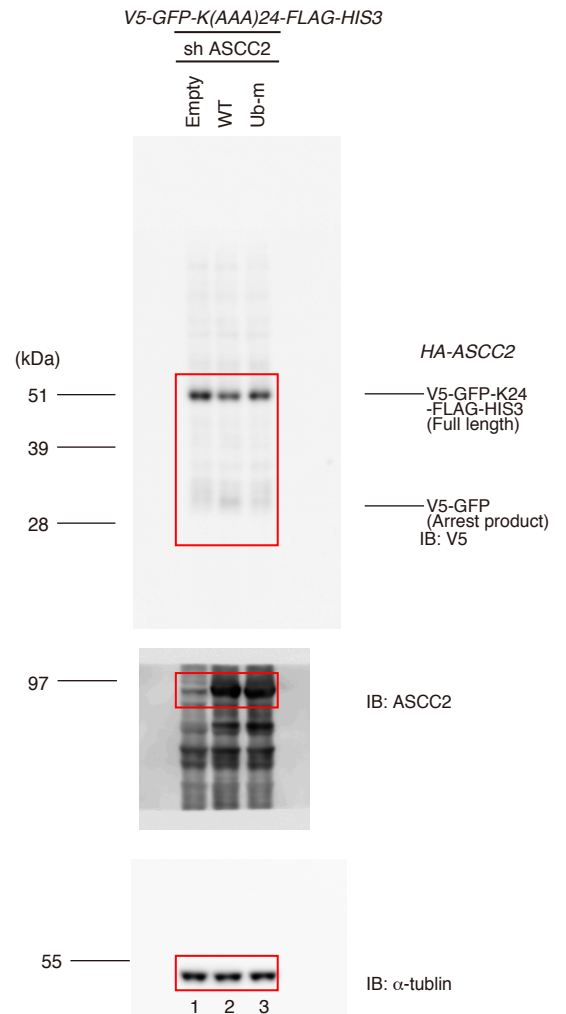

6C

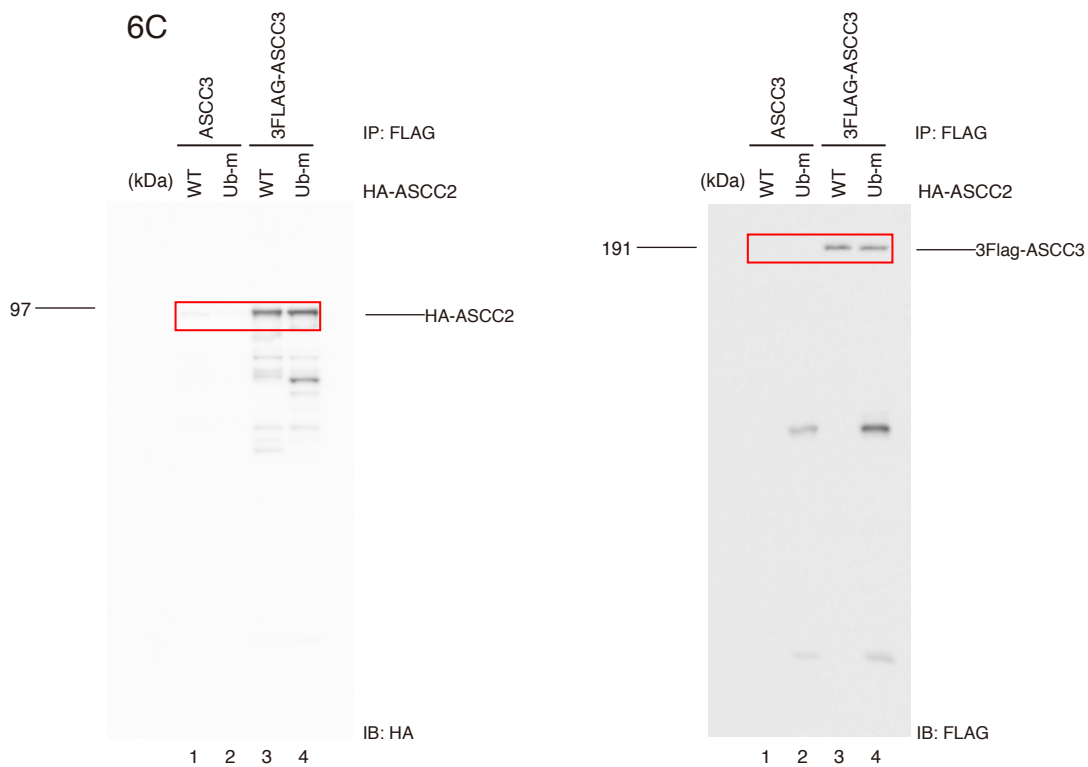

Fig. S9

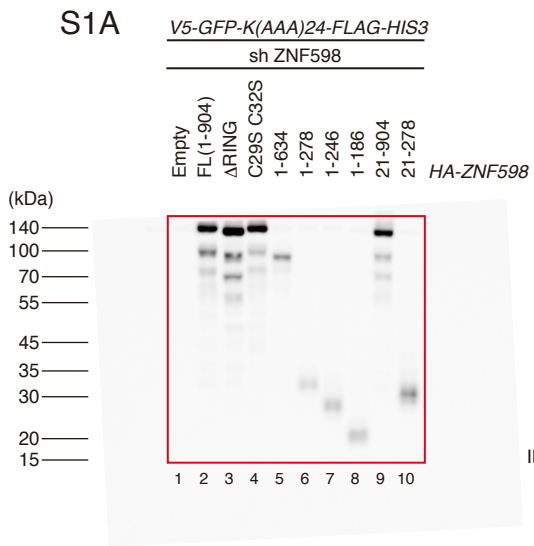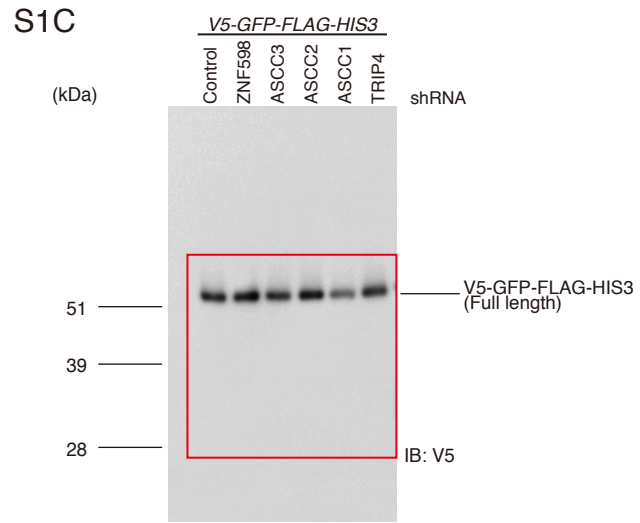

Supplement: 41598_2020_60241_MOESM1_ESM.pdf [file 41598_2020_60241_MOESM1_ESM.pdf]
